# Supplementary material
Source: HighWire-hosted journal article supplement (https://bmjopen.bmj.com/content/9/10/e031774)
Supplement: inline-supplementary-material-1 [file inline-supplementary-material-1.pdf]

### Supplementary file - Main characteristics of potential diagnostic biomarkers for TIA

| Biomarker (abbreviation) | Full name                                       | Main biological action                                                                                                                                                                               | Main study reference    |
|--------------------------|-------------------------------------------------|------------------------------------------------------------------------------------------------------------------------------------------------------------------------------------------------------|-------------------------|
| B-FABP                   | Brain-type fatty acid binding protein           | Protein involved in the intracellular transport and oxidation of fatty acids, and membrane lipid trafficking, expressed in glial cells                                                               | Wunderlich, et al. [18] |
| H-FABP                   | Heart-type fatty acid binding protein           | Protein involved in the intracellular transport and oxidation of fatty acids, and membrane lipid trafficking, expressed in myocardium but also in neuronal cell bodies in the central nervous system | Wunderlich, et al. [18] |
| PARK7                    | Parkinson protein 7                             | RNA binding protein regulatory subunit, protects neurons against oxidative stress and cell death                                                                                                     | Allard, et al. [19]     |
| NDKA                     | Nucleoside diphosphate kinase A                 | Enzyme catalysing transfer of phosphate groups between nucleoside tri-phosphates and nucleoside diphosphates (e.g. ATP to GDP), expressed in neurons                                                 | Allard, et al. [19]     |
| UFDP                     | Ubiquitin fusion degradation protein 1          | Enzyme in the pathway for degrading ubiquitin-protein conjugates, involved in protein degradation in cell damage                                                                                     | Allard, et al. [20]     |
| NR2A/2B                  | N-Methyl-D-aspartate (NMDA) receptor subunits   | Product of the proteolytic degradation of NMDA receptors (part of the ischaemic cascade in the brain)                                                                                                | Dambinova, et al. [16]  |
| NR2A/2B Ab               | N-Methyl-D-aspartate (NMDA) receptor antibodies | Antibodies to NMDA receptor fragments                                                                                                                                                                | Weismann, et al. [17]   |

This table was presented as Table 1 in our published study protocol entitled 'Serum biomarkers for the early diagnosis of TIA: the MIND-TIA study'. [12]
